# Supplementary material
Source: PubMed Central journal article supplement (PMC4515402)
Supplement: NIHMS676377-supplement-Supp_TableS1-S2.pdf [file NIHMS676377-supplement-Supp_TableS1-S2.pdf]

**Supplementary Table 1. Baseline Characteristics of Lupus Nephritis ESRD patients 1995-2008 in the U.S., who were Medicare A+B recipients (included in analyses of non-fatal CV events)**

|                                                   | Total<br>N= 6,064 | Whites<br>N=<br>2,566 | African<br>Americ<br>ns<br>N= 3,180 | Asians<br>N= 255 | Native-<br>Americans<br>N= 63 | p value* | Non-<br>Hispanics<br>N= 5,141 | Hispanics<br>N=923 | p value* |
|---------------------------------------------------|-------------------|-----------------------|-------------------------------------|------------------|-------------------------------|----------|-------------------------------|--------------------|----------|
| <b>Demographics</b>                               |                   |                       |                                     |                  |                               |          |                               |                    |          |
| Female                                            | 4,912<br>(81.0%)  | 1,958<br>(76.3%)      | 2,695<br>(84.7%)                    | 208<br>(81.5%)   | 51<br>(80.9%)                 | <0.0001  | 4,174<br>(81.1%)              | 738<br>(79.9%)     | 0.37     |
| Mean age at<br>ESRD onset                         | 41.82 ±<br>16.50  | 45.89 ±<br>18.34      | 39.04 ±<br>14.31                    | 36.41 ±<br>13.93 | 38.27 ±<br>14.19              | <0.0001  | 42.78 ±<br>16.70              | 36.44 ±<br>14.20   | <0.0001  |
| <b>Laboratory measures</b>                        |                   |                       |                                     |                  |                               |          |                               |                    |          |
| Hemoglobin (g/dl)                                 | 9.31 ±<br>1.81    | 9.61 ±<br>1.81        | 9.06 ±<br>1.76                      | 9.44 ±<br>2.01   | 9.44 ± 2.07                   | <0.0001  | 9.31 ±<br>1.81                | 9.30 ± 1.85        | 0.83     |
| eGFR<br>(ml/min/1.73m <sup>2</sup> )<br>(N=6,025) | 8.03 ±<br>4.67    | 8.64 ±<br>4.71        | 7.50 ±<br>4.60                      | 8.32 ±<br>4.57   | 8.40 ± 3.94                   | <0.0001  | 8.01 ±<br>4.69                | 8.15± 4.59         | 0.41     |
| Serum albumin<br>(g/dl)<br>(N=4,929)              | 2.88±<br>0.78     | 3.00 ±<br>0.76        | 2.79±<br>0.79                       | 2.81 ±<br>0.79   | 2.66 ± 0.81                   | <0.0001  | 2.87 ±<br>0.78                | 2.90 ± 0.81        | 0.34     |
| Mean BMI<br>(kg/m <sup>2</sup> )<br>(N=5,816)     | 26.24 ±<br>7.21   | 25.77 ±<br>6.85       | 26.83 ±<br>7.55                     | 23.68 ±<br>5.74  | 25.59 ± 6.04                  | <0.0001  | 26.25 ±<br>7.29               | 26.19 ±<br>6.77    | 0.82     |
| <b>Erythropoietin Stimulating Agent use</b>       |                   |                       |                                     |                  |                               |          |                               |                    |          |
|                                                   | 1,992<br>(32.8%)  | 931<br>(36.2%)        | 948<br>(29.8%)                      | 93<br>(36.4%)    | 20<br>(31.7%)                 | <0.0001  | 1,701<br>(33.0%)              | 291<br>(31.5%)     | 0.35     |
| <b>Comorbidities</b>                              |                   |                       |                                     |                  |                               |          |                               |                    |          |
| Hypertension                                      | 4,739<br>(78.2%)  | 1,937<br>(75.5%)      | 2,561<br>(80.5%)                    | 189<br>(74.1%)   | 52<br>(82.5%)                 | <0.0001  | 4,045<br>(78.6%)              | 694<br>(75.1%)     | 0.01     |
| Current Smoking                                   | 291<br>(4.8%)     | 161<br>(6.2%)         | 120<br>(3.7%)                       | -                | -                             | <0.0001  | 270<br>(5.2%)                 | 21<br>(2.2%)       | <0.0001  |
| Diabetes Mellitus                                 | 589<br>(9.1%)     | 249<br>(9.7%)         | 322<br>(10.1%)                      | -                | -                             | 0.07     | 504<br>(9.8%)                 | 85<br>(9.2%)       | 0.57     |
| Heart Failure                                     | 1,086<br>(17.9%)  | 511<br>(19.9%)        | 529<br>(16.6%)                      | 31<br>(12.1%)    | 15<br>(23.8%)                 | 0.0005   | 956<br>(18.6%)                | 130<br>(14.0%)     | 0.001    |
| Coronary Artery<br>Disease                        | 465<br>(7.6%)     | 297<br>(11.5%)        | 158<br>(4.9%)                       | -                | -                             | <0.0001  | 421<br>(8.1%)                 | 44<br>(4.7%)       | 0.0003   |

|                                              |                  |                |                  |                |               |         |                  |                |         |
|----------------------------------------------|------------------|----------------|------------------|----------------|---------------|---------|------------------|----------------|---------|
| Cerebrovascular Accident                     | 370<br>(6.1%)    | 187<br>(7.3%)  | 166<br>(5.2%)    | -              | -             | 0.008   | 323<br>(6.3%)    | 47<br>(5.1%)   | 0.16    |
| Peripheral Vascular Disease                  | 244<br>(4.0%)    | 128<br>(5.0%)  | 106<br>(3.3%)    | -              | -             | 0.001   | 217<br>(4.2%)    | 27<br>(2.9%)   | 0.06    |
| Chronic Obstructive Pulmonary Disease        | 189<br>(3.1%)    | 120<br>(4.7%)  | 65 (2.0%)        | -              | -             | <0.0001 | 177<br>(3.4%)    | 12<br>(1.3%)   | 0.0006  |
| Cancer                                       | 97<br>(1.6%)     | 59<br>(2.3%)   | 35 (1.1%)        | -              | -             | 0.002   | 92<br>(1.8%)     | -              | 0.005   |
| <b>Medical Insurance</b>                     |                  |                |                  |                |               |         |                  |                |         |
| No Insurance                                 | 874<br>(14.4%)   | 330<br>(12.8%) | 505<br>(15.8%)   | 35<br>(13.7%)  | -             | 0.002   | 691<br>(13.4%)   | 183<br>(19.8%) | <0.0001 |
| Medicare                                     | 1,397<br>(23%)   | 823<br>(32.0%) | 531<br>(16.7%)   | 33<br>(12.9%)  | -             | <0.0001 | 1,301<br>(25.3%) | 96<br>(10.4%)  | <0.0001 |
| Medicaid                                     | 2,637<br>(43.4%) | 906<br>(35.3%) | 1599<br>(50.2%)  | 93<br>(36.4%)  | 39<br>(61.9%) | <0.0001 | 2,193<br>(42.6%) | 444<br>(48.1%) | 0.002   |
| Private                                      | 627<br>(10.3%)   | 261<br>(10.1%) | 322<br>(10.1%)   | 39<br>(15.3%)  | -             | 0.06    | 534<br>(10.4%)   | 93<br>(10.0%)  | 0.77    |
| Other                                        | 490<br>(8.0%)    | 229<br>(8.9%)  | 202<br>(6.3%)    | 54<br>(21.1%)  | -             | <0.0001 | 396<br>(7.7%)    | 94<br>(10.1%)  | 0.0008  |
| <b>Region of Residence</b>                   |                  |                |                  |                |               |         |                  |                |         |
| Northeast                                    | 891<br>(14.7%)   | 422<br>(16.4%) | 433<br>(13.6%)   | 34<br>(13.3%)  | -             | 0.001   | 772<br>(15.0%)   | 119<br>(12.9%) | 0.09    |
| West                                         | 977<br>(16.1%)   | 602<br>(23.4%) | 213<br>(6.7%)    | 141<br>(55.3%) | 21<br>(33.3%) | <0.0001 | 672<br>(13.0%)   | 305<br>(33.0%) | <0.0001 |
| South                                        | 3,010<br>(49.6%) | 969<br>(37.7%) | 1,975<br>(62.1%) | 44<br>(17.2%)  | 22<br>(34.9%) | <0.0001 | 2,652<br>(51.6%) | 358<br>(38.8%) | <0.0001 |
| Midwest                                      | 1,101<br>(18.1%) | 509<br>(18.8%) | 549<br>(17.2%)   | 25<br>(9.8%)   | 18<br>(28.5%) | <0.0001 | 1,028<br>(20.0%) | 73<br>(7.9%)   | <0.0001 |
| Other territories                            | 85<br>(1.4%)     | 64<br>(2.5%)   | -                | -              | -             | <0.0001 | 17<br>(0.3%)     | 68<br>(7.3%)   | <0.0001 |
| <b>Area-Level Socioeconomic Status (SES)</b> |                  |                |                  |                |               |         |                  |                |         |
| Lowest Quartile of SES in USRDS              | 29.2%            | 29.3%          | 30.5%            | 6.2%           | 52.3%         | <0.0001 | 31.4%            | 16.0%          | <0.0001 |
| <b>Initial ESRD Modality ¥</b>               |                  |                |                  |                |               |         |                  |                |         |
| Hemodialysis                                 | 5,098            | 2,042          | 2,790            | 213            | 53            | <0.0001 | 4,327            | 771            | 0.62    |

|                        |                |                |               |               |         |         |               |                |      |
|------------------------|----------------|----------------|---------------|---------------|---------|---------|---------------|----------------|------|
|                        | (84.0%)        | (79.5%)        | (87.7%)       | (83.5%)       | (79.6%) |         | (84.15)       | (83.5%)        |      |
| Peritoneal dialysis    | 611<br>(10.0%) | 303<br>(11.8%) | 272<br>(8.5%) | 28<br>(10.9%) | -       | 0.0006  | 500<br>(9.7%) | 111<br>(12.0%) | 0.03 |
| Pre-emptive transplant | 79<br>(1.3%)   | 64<br>(2.5%)   | 12<br>(0.38%) | -             | -       | <0.0001 | 67<br>(1.3%)  | 12<br>(1.3%)   | 0.99 |

Cell sizes < 11 suppressed per Federal research regulations.

\*Chi-squared tests for categorical values and t- tests for continuous variables. With Bonferroni correction for multiple comparisons, threshold for statistical significance= 0.025

¥ 4.55% of patients were classified as uncertain for the initial renal replacement modality in the Medical Evidence Report at entry into USRDS.

**Supplementary Table 2. Unadjusted Incidence Rates for Hospital Non-fatal Admissions for Cardiovascular Events among Patients with Lupus Nephritis ESRD in the U.S., 1995-2008**

|                         | Heart Failure    |              |                    | Myocardial Infarction |              |                  | Ischemic Stroke  |              |                  | Hemorrhagic Stroke |              |                |
|-------------------------|------------------|--------------|--------------------|-----------------------|--------------|------------------|------------------|--------------|------------------|--------------------|--------------|----------------|
|                         | Number of Events | Person years | IR* (95% CI)       | Number of Events      | Person years | IR* (95% CI)     | Number of Events | Person years | IR* (95% CI)     | Number of Events   | Person years | IR* (95% CI)   |
| <b>All patients</b>     | 3,477            | 39,898       | 87.1 (84.3-90.1)   | 724                   | 47,657       | 15.1 (14.1-16.3) | 691              | 47,515       | 14.5 (13.5-15.6) | 253                | 48,482       | 5.2 (4.6-5.9)  |
| <b>Race</b>             |                  |              |                    |                       |              |                  |                  |              |                  |                    |              |                |
| <b>White</b>            | 1,378            | 17,752       | 77.6 (73.6-81.8)   | 343                   | 20,412       | 16.8 (15.1-18.6) | 308              | 20,411       | 15.0 (13.5-16.8) | 86                 | 20,829       | 4.1 (3.3-5.1)  |
| <b>African American</b> | 1,955            | 19,370       | 100.9 (96.5-105.5) | 352                   | 24,163       | 14.5 (13.1-16.1) | 363              | 24,004       | 15.1 (13.6-16.7) | 150                | 24,531       | 6.1 (5.2-7.1)  |
| <b>Asian</b>            | 105              | 2,444        | 42.9 (35.4-52.0)   | 25                    | 2,657        | 9.4 (6.3-13.9)   | 17               | 2,671        | 6.3 (3.9-10.2)   | 13                 | 2,694        | 4.8 (2.8-8.3)  |
| <b>Native American</b>  | 39               | 330          | 117.9 (86.1-161.4) | --                    | 424          | 9.4 (3.5-25.1)   | --               | 427          | 7.0 (2.2-21.7)   | --                 | 427          | 9.3 (3.5-24.9) |

| Ethnicity           |       |        |                     |     |        |                     |     |        |                     |     |        |                  |
|---------------------|-------|--------|---------------------|-----|--------|---------------------|-----|--------|---------------------|-----|--------|------------------|
| <b>Non-Hispanic</b> | 3,060 | 32,914 | 92.9<br>(89.7-96.3) | 647 | 39,589 | 16.3<br>(15.1-17.6) | 615 | 39,465 | 15.5<br>(14.4-16.8) | 226 | 40,324 | 5.6<br>(4.9-6.3) |
| <b>Hispanic</b>     | 417   | 6,983  | 59.7<br>(54.2-65.7) | 77  | 8,067  | 9.5 (7.6-11.9)      | 76  | 8,049  | 9.4 (7.5-11.9)      | 27  | 8,158  | 3.3 (2.2-4.8)    |

\* IR= Incidence rate per 1,000 SLE patients in USRDS per year. Cell sizes < 11 suppressed per Federal research regulations
